# Supplementary material for: Myofibroblast-specific inhibition of ASPP1 alleviates myocardial fibrosis by enhancing p53 degradation
Source: Research Square preprint supplement (doi:10.21203/rs.3.rs-3709538/v1), 2023-12-11
Supplement: Supplementary file 1 [file 809b33aee4f8b8582a8e5623.docx]

**Supplementary Information**

**Supplementary Figures**

**Supplementary Figure 1**


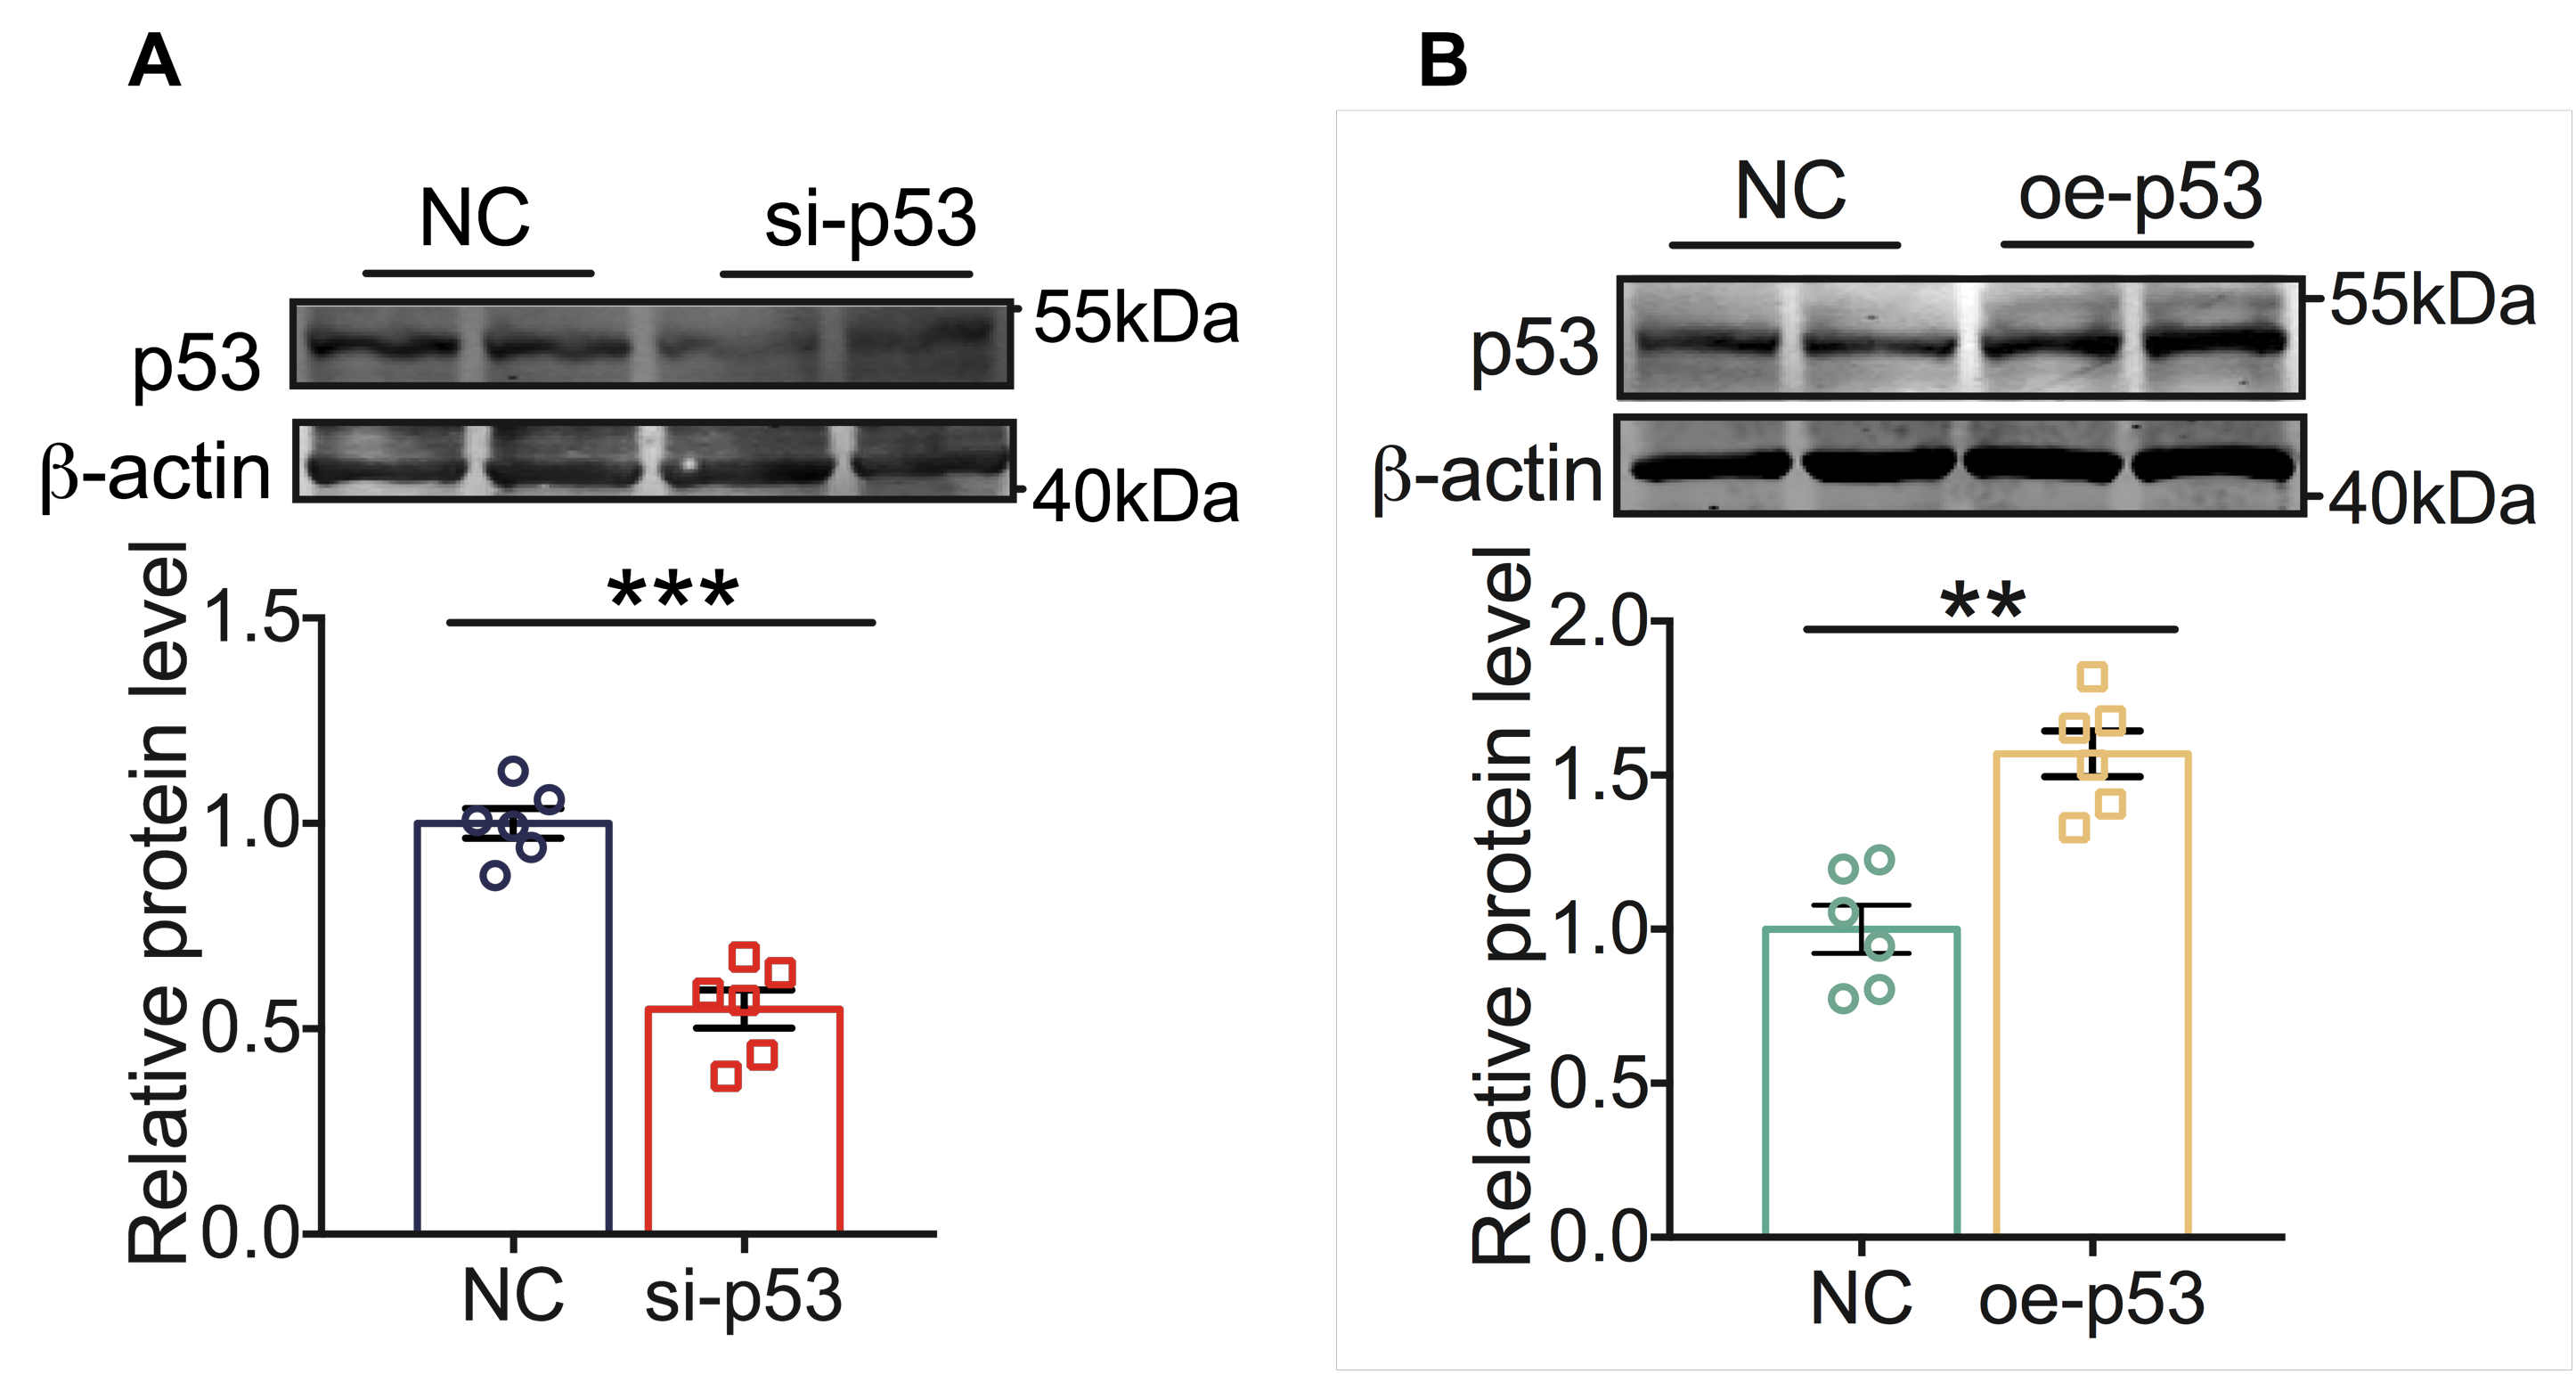


**Supplementary Figure 1. Knockdown and overexpression efficiency for p53.** (**A**) Efficiency of si-p53 in PMCFs by Western blot n = 6. (**B**) Efficiency of p53 overexpression plasmid in PMCFs by Western blot. n = 6. Data are represented as mean ± SEM. Statistics: Student’s t test was used to calculate the presented P values in **A** and **B**.

**Supplementary Figure 2**


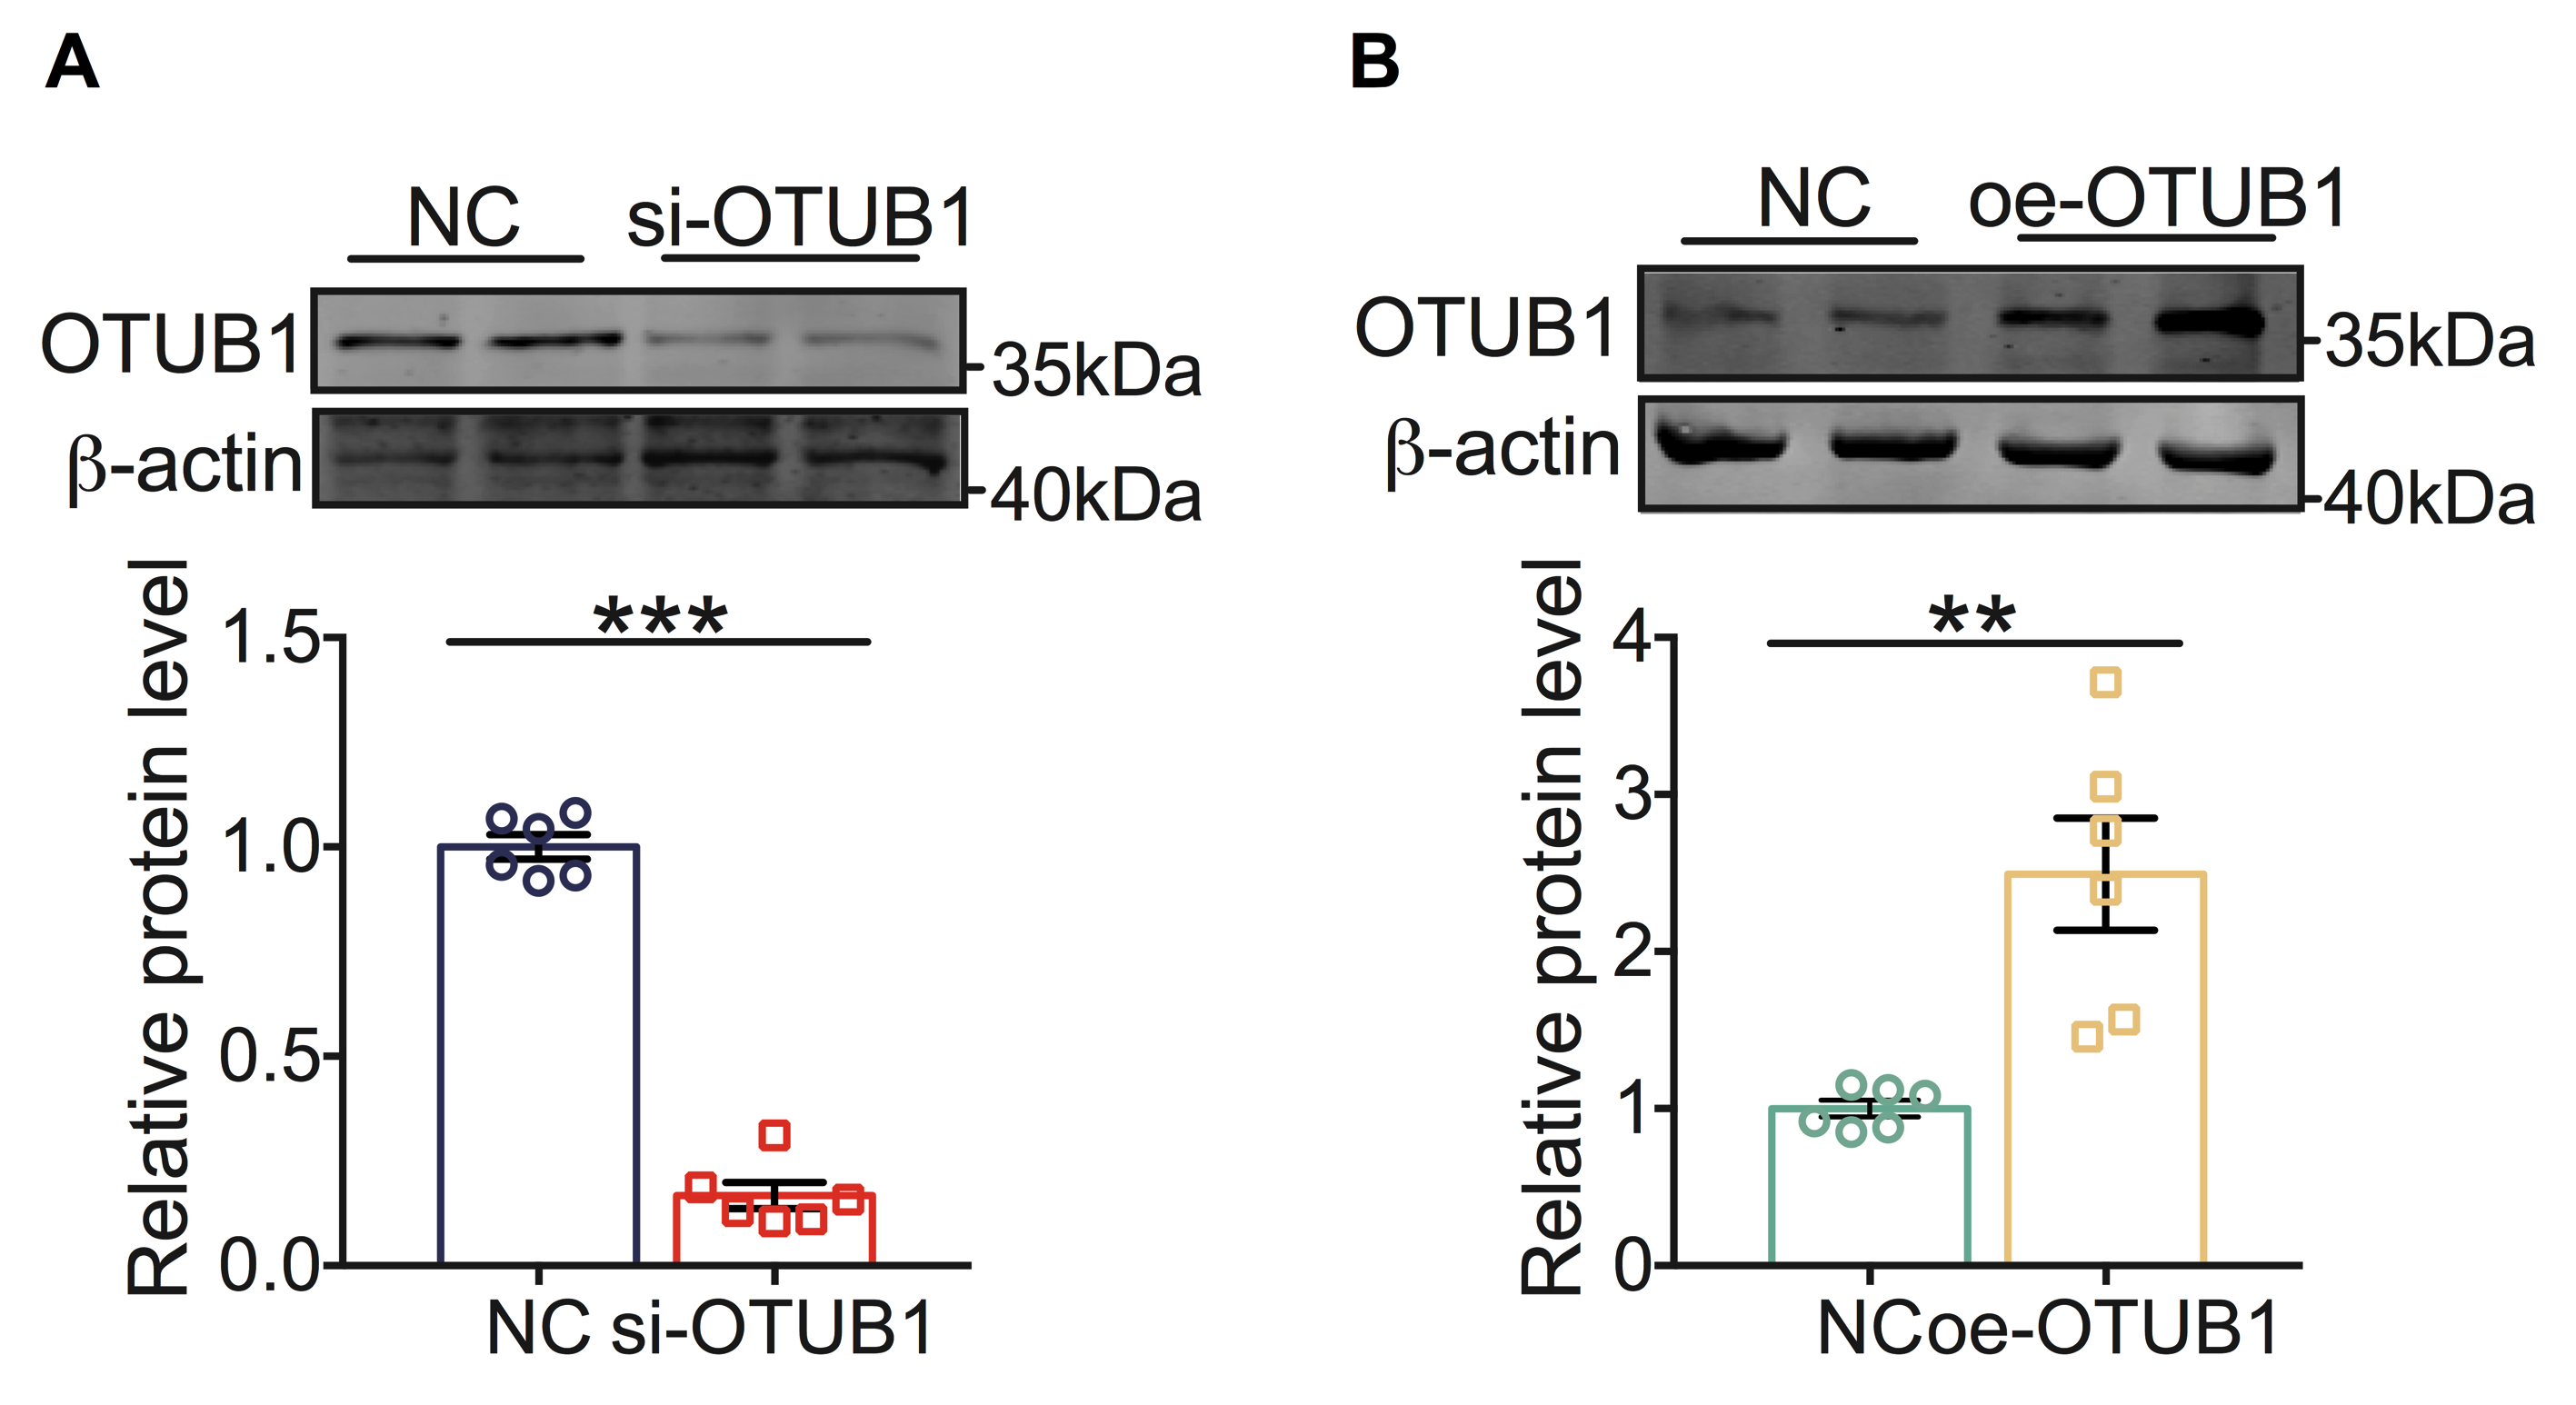


**Supplementary Figure 2. Knockdown and overexpression efficiency for OTUB1.** (**A**) Efficiency of si-OTUB1 in PMCFs by Western blot. n = 6. (**B**) Efficiency of OTUB1 overexpression plasmid in PMCFs by Western blot. n = 6. Data are represented as mean ± SEM. Statistics: Student’s t test was used to calculate the presented P values in **A** and **B**.

**Supplementary Table 1. gRNA target sequence of ASPP1**

| gRNA1 (matching forward strand of gene) | GAGTTACAGACATGTGGTGCTGG |
| --- | --- |
| gRNA2 (matching reverse strand of gene) | TCTAGCTTCTCTGTGGTACAGGG |

**Supplementary Table 2. Sequences of mouse oligonucleotide primers used for real-time quantitative PCR**

| ASPP1 | Forward | 5'-ATGCCGATGATATTAACCGTGTT-3' |
| --- | --- | --- |
| Reverse | 5'-ATGTGGTCATAGGGGATGGGA-3' |
| p53 | Forward | 5'-CTCTCCCCCGCAAAAGAAAAA-3' |
| Reverse | 5'-CGGAACATCTCGAAGCGTTTA-3' |
| Col1a1 | Forward | 5'-TTCTCCTGGCAAAGACGGAC-3' |
| Reverse | 5'-CGGCCACCATCTTGAGACTT-3' |
| Col3a1 | Forward | 5'-ACGTAAGCACTGGTGGACAG-3' |
| Reverse | 5'-CAGGAGGGCCATAGCTGAAC-3' |
| Ccna2 | Forward | 5'-AAGAGAATGTCAACCCCGAAAAA-3' |
| Reverse | 5'-ACCCGTCGAGTCTTGAGCTT-3' |
| Ccnb1 | Forward | 5'-GCGTGTGCCTGTGACAGTTA-3' |
| Reverse | 5'-CCTAGCGTTTTTGCTTCCCTT-3' |
| Ccne1 | Forward | 5'-CTCCGACCTTTCAGTCCGC-3' |
| Reverse | 5'-CACAGTCTTGTCAATCTTGGCA-3' |
| Cdk1 | Forward | 5'-AGGTACTTACGGTGTGGTGTAT-3' |
| Reverse | 5'-CTCGCTTTCAAGTCTGATCTTCT-3' |
| Cdkn1a | Forward | 5'-CCTGGTGATGTCCGACCTG-3' |
| Reverse | 5'-CCATGAGCGCATCGCAATC-3' |
| Postn | Forward | 5'-TGGTATCAAGGTGCTATCTGCG-3' |
| Reverse | 5'-AATGCCCAGCGTGCCATAA-3' |
| Tcf21 | Forward | 5'-CTCCCTGAAAGTGGACTCCAA-3' |
| Reverse | 5'-CGGGCTTTTCTTAGTGGGC-3' |
| Fn1 | Forward | 5'-CCCAACTGGTTACCCTTCCA-3' |
| Reverse | 5'-GGTTGGTGATGAAGGGGGTC-3' |
| Acta2 | Forward | 5'-GTACCACCATGTACCCAGGC-3' |
| Reverse | 5'-GCTGGAAGGTAGACAGCGAA-3' |
| β-actin | Forward | 5'-CTGAGCTGCGTTTTACACCCT-3' |
| Reverse | 5'-CGCCTTCACCGTTCCAGTT-3' |
